# Supplementary material for: Breaking the O(ln n) Barrier: An Enhanced Approximation Algorithm for Fault-Tolerant Minimum Weight Connected Dominating Set
Source: Atypon-hosted journal article supplement (doi:10.1287/ijoc.2017.0775), 2018-04-02
Supplement: ijoc.2017.0775-sm.pdf [file ijoc.2017.0775-sm.pdf]

# Appendix to the Paper Breaking the $O(\ln n)$ Barrier: An Enhanced Approximation Algorithm for Fault-Tolerant Minimum Weight Connected Dominating Set

Jiao Zhou, Zhao Zhang\*

College of Mathematics Physics and Information Engineering, Zhejiang Normal University

Shaojie Tang

Naveen Jindal School of Management, The University of Texas at Dallas

Xiaohui Huang

College of Mathematics Physics and Information Engineering, Zhejiang Normal University

Dingzhu Du

Department of Computer Science, University of Texas at Dallas

---

## ► The Analysis of $D_1$

To analyze  $D_1$  in Algorithm 1, we need the concept of polymatroid and submodular cover. Potential function  $f$  is *monotone increasing* if  $f(C) \leq f(D)$  holds for any subsets  $C \subseteq D \subseteq V$ . It is *submodular* if and only if  $\Delta_u f(C) \geq \Delta_u f(D)$  holds for any  $C \subseteq D \subseteq V$  and any  $u \in V \setminus D$ . A monotone increasing and submodular function  $f$  with  $f(\emptyset) = 0$  is called a *polymatroid*. Given an element set  $U$  with cost function  $c : U \mapsto \mathbb{R}^+$  and given a polymatroid  $f : 2^U \mapsto \mathbb{R}^+$ , denote by  $\Omega_f = \{C \subseteq U : \Delta_u f(C) = 0 \text{ for any } u \in U\}$ . The *Submodular Cover* problem is:

$$\min c(C) = \sum_{u \in C} c(u)$$

\*Corresponding author: hxhzz@sina.com.

$$s.t. C \in \Omega_f.$$

The following is a classic result which can be found in (Du et al. 2011) Theorem 2.29.

**Theorem 0.1.** *The greedy algorithm for the submodular cover problem has performance ratio  $H(\gamma)$ , where  $\gamma = \max\{f(\{u\}) : u \in U\}$  and  $H(\gamma) = \sum_{i=1}^{\gamma} 1/i$  is the Harmonic number.*

**Lemma 0.2.** *Function  $q$  is a polymatroid.*

*Proof.* Obviously,  $q(\emptyset) = 0$ . It is easy to see that for any node  $u \in V$ , function  $-q_C(u)$  is monotone increasing and submodular with respect to  $C$ . So, function  $q$ , being the summation of a constant function and some monotone increasing and submodular functions, is also monotone increasing and submodular.  $\square$

► **Proof of Theorem 4.1.**

*Proof.* If there exists a node  $u \in V \setminus D_1$  with  $|N_{D_1}(u)| < m$ , then  $-\Delta_u q_{D_1}(u) = -q_{D_1 \cup \{u\}}(u) + q_{D_1}(u) = -0 + (m - |N_{D_1}(u)|) > 0$ , and  $-\Delta_u q_{D_1}(v) \geq 0$  for any node  $v \in V \setminus \{u\}$  (by the monotonicity of  $-q_{D_1}(v)$  with respect to  $D_1$ ). Thus  $\Delta_u q(D_1) = -\sum_{v \in V} \Delta_u q_{D_1}(v) > 0$ , and the algorithm does not terminate at this stage. Hence when the algorithm jumps out of the first while loop,  $D_1$  is an  $m$ -DS.

By Lemma 0.2, the minimum weight  $m$ -fold dominating set problem is a special submodular cover problem with potential function  $q$ . So by Theorem 0.1, we have  $w(D_1) \leq H(\gamma) \cdot opt'$ , where  $opt'$  is the optimal value for the  $m$ -MWDS problem. Then, the result follows from the observation that  $opt' \leq opt$  and  $\gamma = \max_{u \in V} \{q(\{u\})\} = \max_{u \in V} \{m|V| - \sum_{v \in V \setminus \{u\}} (m - |N_{\{u\}}(v)|)\} = \max_{u \in V} \{m + d_G(u)\} = m + \delta$ .  $\square$

## References

- Du, Ding-Zhu, Ker-I Ko, Xiaodong Hu. 2011. *Design and analysis of approximation algorithms*, vol. 62. Springer Science & Business Media.
